# Supplementary material for: Mn decorated Na/Fe catalysts for CO2 hydrogenation to light olefins
Source: Royal Society of Chemistry journal article supplement (doi:10.1039/c8cy02275e), 2018-12-05
Supplement: c8cy02275e1.pdf [file c8cy02275e1.pdf]

## **Supplementary Information**

### **Mn decorated Na/Fe catalysts for CO<sub>2</sub> hydrogenation to light olefins**

Binglian Liang<sup>a,b</sup>, Ting Sun<sup>c</sup>, Junguo Ma<sup>a</sup>, Hongmin Duan<sup>a</sup>, Lin Li<sup>a</sup>, Xiaoli Yang<sup>a</sup>,  
Yaru Zhang<sup>a</sup>, Xiong Su<sup>a</sup>, Yanqiang Huang<sup>a,\*</sup>, Tao Zhang<sup>a</sup>

<sup>a</sup> State Key Laboratory of Catalysis, Dalian Institute of Chemical Physics, Chinese Academy of Sciences, 457 Zhongshan Road, Dalian, 116023, China.

<sup>b</sup> University of Chinese Academy of Sciences, 19A Yuquan Road, Beijing, 100049, China.

<sup>c</sup> College of Chemistry and Materials Science, Sichuan Normal University, Chengdu, 610068, China.

#### **\*Corresponding Author**

Fax: (+) 86-411-84685940; Tel: (+) 86-411-84379416; E-mail: yqhuang@dicp.ac.cn

**Table S1** Catalytic performance of 5Mn-Na/Fe catalyst for CO<sub>2</sub> hydrogenation at different reaction pressure.

| P(MPa) | X-CO <sub>2</sub> | S-CO | S-CH <sub>4</sub> | S-C <sub>2</sub> =-C <sub>4</sub> = | S-C <sub>2</sub> <sup>0</sup> -C <sub>4</sub> <sup>0</sup> | S-C <sub>5</sub> + | O/P  |
|--------|-------------------|------|-------------------|-------------------------------------|------------------------------------------------------------|--------------------|------|
| 3      | 38.6              | 11.7 | 11.8              | 30.2                                | 4.0                                                        | 42.1               | 7.5  |
| 2      | 34.5              | 17.1 | 9.9               | 29.5                                | 3.0                                                        | 40.0               | 9.8  |
| 1      | 32.0              | 22.5 | 6.8               | 27.2                                | 2.3                                                        | 40.7               | 12.1 |
| 0.5    | 28.8              | 32.2 | 6.4               | 25.6                                | 2.2                                                        | 33.0               | 11.7 |
| 0.1    | 23.4              | 70.7 | 4.4               | 13.0                                | 1.2                                                        | 9.3                | 11.3 |

Reaction conditions: H<sub>2</sub>/CO<sub>2</sub> = 3; 320 °C; 2040 mL h<sup>-1</sup> g<sub>cat</sub><sup>-1</sup>; TOS = 10 h. O/P: The ratio of olefin to paraffin in the C<sub>2</sub>–C<sub>4</sub> range hydrocarbons.

**Table S2** Catalytic performance of 1Na/Fe<sub>5</sub>C<sub>2</sub> catalyst for CO<sub>2</sub> hydrogenation.

| catalyst                           | X-CO <sub>2</sub> | S-CO | S-CH <sub>4</sub> | S-C <sub>2</sub> =-C <sub>4</sub> = | S-C <sub>2</sub> <sup>0</sup> -C <sub>4</sub> <sup>0</sup> | S-C <sub>5</sub> + | O/P <sup>a</sup> |
|------------------------------------|-------------------|------|-------------------|-------------------------------------|------------------------------------------------------------|--------------------|------------------|
| 1Na/Fe <sub>5</sub> C <sub>2</sub> | 34.7              | 11.9 | 8.3               | 24.7                                | 2.5                                                        | 52.1               | 9.8              |

<sup>a</sup> The ratio of olefin to paraffin in the C<sub>2</sub>–C<sub>4</sub> range hydrocarbons. The catalyst was without H<sub>2</sub> pre-reduction and direct applied in CO<sub>2</sub> hydrogenation. Reaction conditions: H<sub>2</sub>/CO<sub>2</sub> = 3; 320 °C; 3.0 MPa; 2040 mL h<sup>-1</sup> g<sub>cat</sub><sup>-1</sup>.

**Table S3** Mössbauer parameters of the fresh and used 1Na/Fe<sub>5</sub>C<sub>2</sub> catalysts.

| Catalyst                                    | Assignment                           | IS<br>(mm s <sup>-1</sup> ) | QS<br>(mm s <sup>-1</sup> ) | Line<br>Width<br>h | Hhf<br>(kOe) | Relative<br>Abundance (%) |
|---------------------------------------------|--------------------------------------|-----------------------------|-----------------------------|--------------------|--------------|---------------------------|
| Fresh<br>1Na/Fe <sub>5</sub> C <sub>2</sub> | Fe <sub>5</sub> C <sub>2</sub> (I)   | 0.16                        | 0.14                        | 0.48               | 177          | 37.8                      |
|                                             | Fe <sub>5</sub> C <sub>2</sub> (II)  | 0.22                        | 0.09                        | 0.48               | 215          | 46.5                      |
|                                             | Fe <sub>5</sub> C <sub>2</sub> (III) | 0.15                        | 0.14                        | 0.39               | 110          | 15.6                      |
| Used<br>1Na/Fe <sub>5</sub> C <sub>2</sub>  | Fe <sub>3</sub> O <sub>4</sub> (A)   | 0.3                         | 0                           | 0.29               | 493          | 26.8                      |
|                                             | Fe <sub>3</sub> O <sub>4</sub> (B)   | 0.66                        | 0                           | 0.35               | 461          | 50.0                      |
|                                             | Fe <sub>5</sub> C <sub>2</sub> (I)   | 0.22                        | 0.09                        | 0.22               | 183          | 9.2                       |
|                                             | Fe <sub>5</sub> C <sub>2</sub> (II)  | 0.15                        | 0.14                        | 0.58               | 214          | 9.3                       |
|                                             | Fe <sub>5</sub> C <sub>2</sub> (III) | 0.14                        | 0.11                        | 0.58               | 107          | 4.7                       |

Reaction conditions: H<sub>2</sub>/CO<sub>2</sub> = 3; 320 °C; 3.0 MPa; 2040 mL h<sup>-1</sup> g<sub>cat</sub><sup>-1</sup>; TOS = 10 h.

**Table S4** Catalytic performance of 1Na/Fe and 5Mn-Na/Fe catalyst for C<sub>2</sub>H<sub>4</sub> hydrogenation

| Catalyst  | X C <sub>2</sub> H <sub>4</sub> | Y CH <sub>4</sub> | Y C <sub>2</sub> H <sub>6</sub> | Y C <sub>3</sub> H <sub>6</sub> | Y C <sub>3</sub> H <sub>8</sub> |
|-----------|---------------------------------|-------------------|---------------------------------|---------------------------------|---------------------------------|
| 1Na/Fe    | 17.6                            | 1.3               | 15.1                            | 1.1                             | 0.1                             |
| 5Mn-Na/Fe | 17.4                            | 0.5               | 15.8                            | 1.1                             | 0.1                             |

Reaction conditions: 320 °C; H<sub>2</sub>/C<sub>2</sub>H<sub>4</sub> = 5; 0.1 MPa; 3600 mL h<sup>-1</sup> g<sub>cat</sub><sup>-1</sup>; X C<sub>2</sub>H<sub>4</sub> is the conversion of C<sub>2</sub>H<sub>4</sub>; Y is the yield of product.

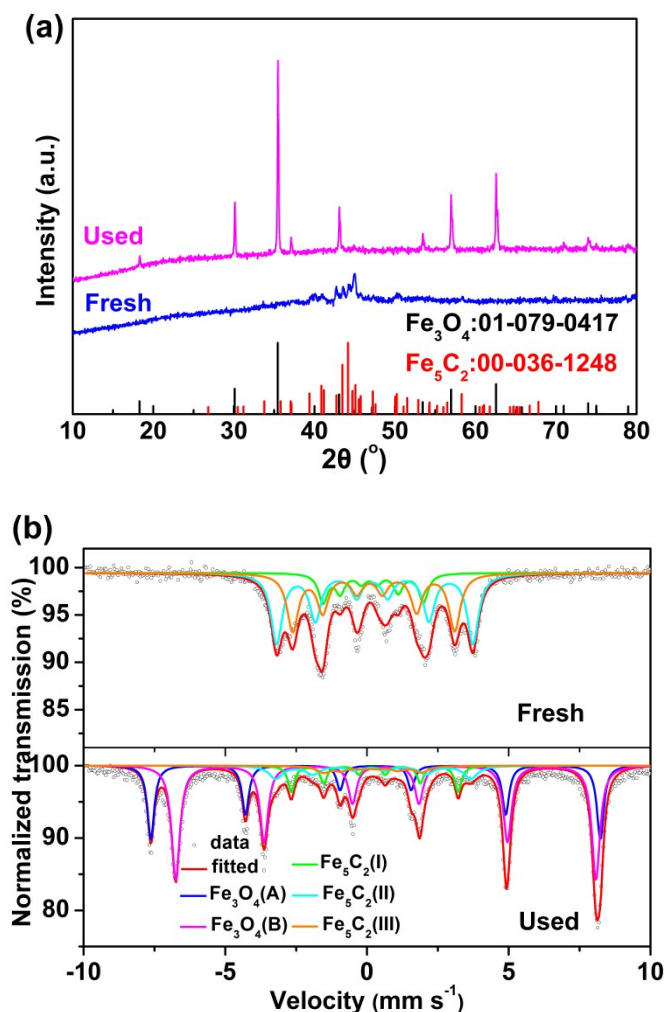

**Fig. S1** XRD patterns (a) and Mössbauer spectra (b) of the fresh and used 1Na/ $\text{Fe}_5\text{C}_2$  catalysts.

The 1Na/ $\text{Fe}_5\text{C}_2$  catalyst was synthesized by carbonizing the iron oxide in CO/ $\text{N}_2$  atmosphere as reported (J. Mater. Sci. 1990, 25, 4457-4461). XRD patterns (Fig. S1a) show the formation of  $\text{Fe}_5\text{C}_2$  species (PDF: 00-36-1248), confirmed by the Mössbauer spectra (Fig. S1b and Table S3). Table S2 shows the catalytic performance of 1Na/ $\text{Fe}_5\text{C}_2$  catalyst. The  $\text{CO}_2$  conversion and  $\text{C}_2^-$ - $\text{C}_4^-$  selectivity of 1Na/ $\text{Fe}_5\text{C}_2$  catalyst was basically equal to 1Na/Fe catalyst, confirming the role of  $\text{Fe}_5\text{C}_2$ . Mössbauer

spectroscopy characterization of the used  $\text{Fe}_5\text{C}_2$  catalyst indicated the  $\text{Fe}_3\text{O}_4$  and  $\text{Fe}_5\text{C}_2$  contents were 76.8% and 23.2%, respectively (Table S3). The majority of  $\text{Fe}_5\text{C}_2$  species were converted to  $\text{Fe}_3\text{O}_4$  under the  $\text{CO}_2$  hydrogenation reaction conditions, possibly due to the oxidizing atmosphere of  $\text{CO}_2$  and  $\text{H}_2\text{O}$ . Besides, this result also indicates that both the  $\text{Fe}_3\text{O}_4$  and  $\text{Fe}_5\text{C}_2$  species are important for  $\text{CO}_2$  hydrogenation to olefins.  $\text{Fe}_3\text{O}_4$  acted as active species for  $\text{CO}_2$  converting to CO and  $\text{Fe}_5\text{C}_2$  species are active for hydrocarbon formation from C-C coupling reaction. Therefore, it can be inferred that  $\text{Fe}_5\text{C}_2$  species plays a critical role in the formation of olefins in  $\text{CO}_2$  hydrogenation.
